# Supplementary material for: The mitochondrial carrier SLC25A10 regulates cancer cell growth
Source: PubMed Central journal article supplement (PMC4496216; doi:10.18632/oncotarget.3375), 2015-03-03
Supplement: oncotarget-06-9271-s001.pdf [file oncotarget-06-9271-s001.pdf]

SUPPLEMENTARY FIGURES AND TABLES

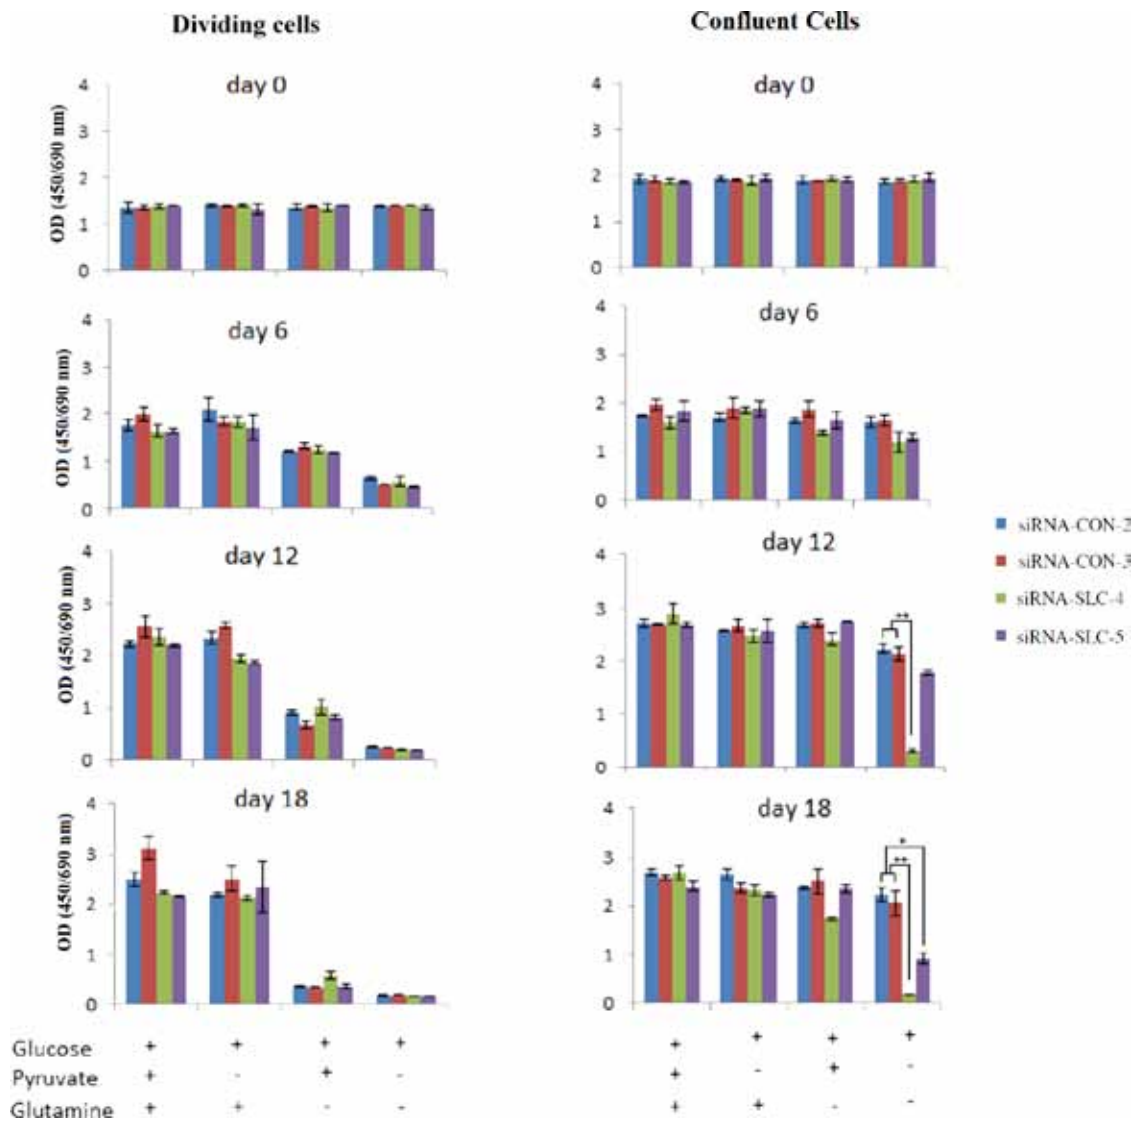

**Supplementary Figure S1: SLC25A10 knockdown in A549 cells.** Glutamine sensitivity changes in proliferating and confluent cells. Glucose, glutamine and pyruvate concentrations were 25 mM, 2 mM and 1 mM respectively. The experiment was repeated 3 times, and all data are presented as mean  $\pm$  SD, \* represents  $p < 0.05$ ; \*\* represents  $p < 0.01$ .

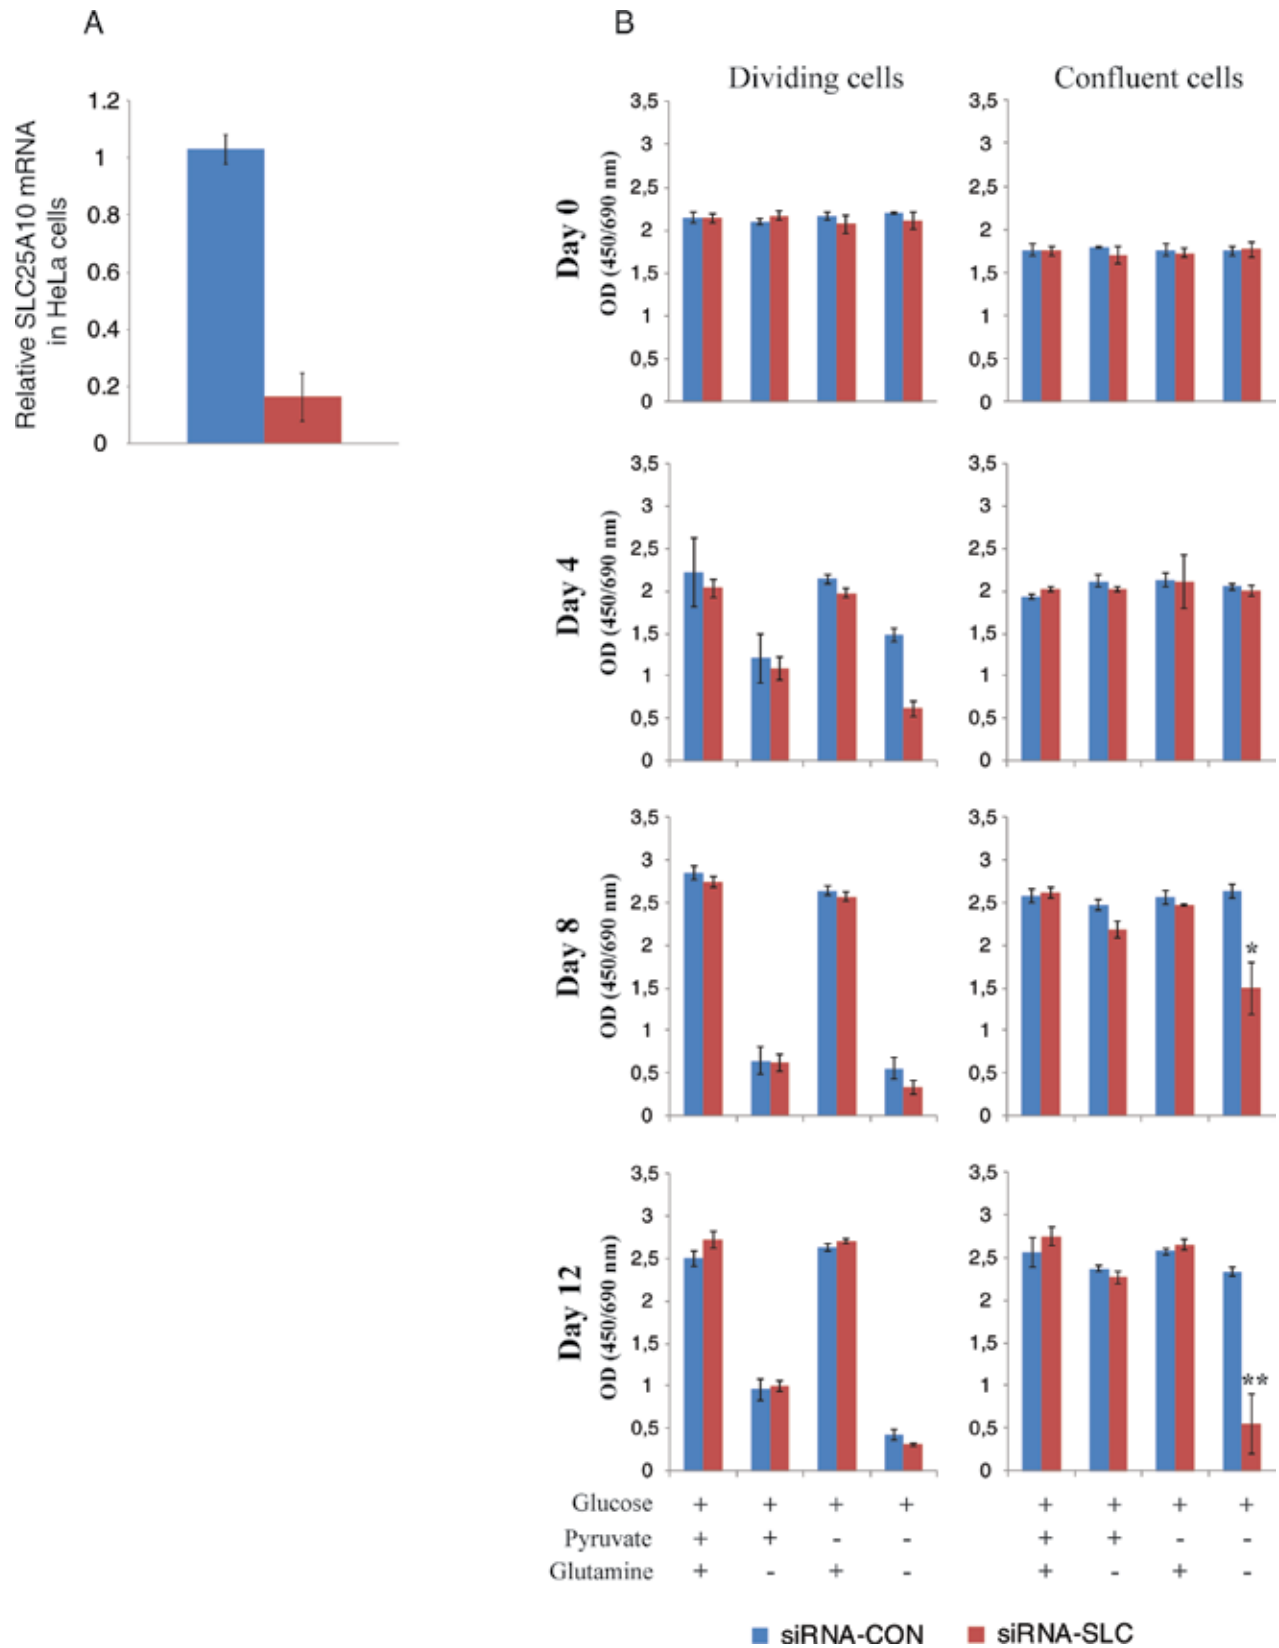

**Supplementary Figure S2: SLC25A10 knockdown in HeLa cells.** (A) Gene expression of SLC25A10 in siRNA-CON and siRNA-SLC knockdown cells. (B) Glutamine sensitivity changes in proliferating and confluent cells. Glucose, glutamine and pyruvate concentrations were 25 mM, 2 mM and 1 mM respectively. The experiment was repeated 3 times, and all data are presented as mean  $\pm$  SD, \* represents  $p < 0.05$ ; \*\* represents  $p < 0.01$ .

**Supplementary Table S1: Sequences for the primers used in real-time PCR analysis**

|                 |                                                          |
|-----------------|----------------------------------------------------------|
| SLC25A10        | 5'-CTTAGCACCGGGTACCTCTC-3'<br>5'-GCACATCCACCTGCAATAAA-3' |
| DRP1            | 5'-GCTCATTCTTCGGTTCATCA-3'<br>5'-GCGACCATCTGGATCTACCT-3' |
| MFN1            | 5'-ACTCCCCTGCTCCTACCAC-3'<br>5'-TCCAAATCACTCCTCCAACA-3'  |
| GLUD1           | 5'-GACAGGATATCGGGTGCATCT-3'<br>5'-CATGGCTGTGCGCATAATT-3' |
| GLUD2           | 5'-GCCTTGGCATAACAATGGA-3'<br>5'-TGAAGGTCACACCAGCTTCAC-3' |
| PDHA1           | 5'-CTGAGAGTGGATGGAATGGA-3'<br>5'-AATAGGCAGCAGCAAACCTT-3' |
| LDHA            | 5'-ATGGAGATTCAGTGTGCCT-3'<br>5'-TGGGTGCAGAGTCTTCAGAG-3'  |
| LDHB            | 5'-GAGGCAACAGTTCCAAACAA-3'<br>5'-AGCCAGAGACTTCCAGAA-3'   |
| CDKN1A<br>(p21) | 5'-CAGACCAGCATGACAGATTC-3'<br>5'-TTAGGGCTTCCTCTTGAGAA-3' |
| GAPDH           | 5'-CATCTTCCAGGAGCGAGATCC-3'<br>5'-GCAAATGAGCCCCAGCCT-3'  |
| TXN             | 5'-CAAGCCTTCTTTCATTCCC-3'<br>5'-ATGTTGGCATGCATTTGACT-3'  |
| TXNRD1          | 5'-TGAACAAATTGAAGCAGGGA-3'<br>5'-TGCCAGCATCACCGTATTAT-3' |
| TXN2            | 5'-GCCGAGGTTAGAGAAGATGG-3'<br>5'-CACCGCTGACACCTCATACT-3' |
| TXNRD2          | 5'-GTGTCCAGCTTCAGGACAGA-3'<br>5'-GCAGAATCTTTCCACCT-3'    |
| GSR             | 5'-ACTTGCGTGAATGTTGGATG-3'<br>5'-ACCCTCACAACCTTGAAAGC-3' |
| GSS             | 5'-AAGCCTATGCTGTGCAGATG-3'<br>5'-TTTGATGGTGCTGGAAAGAG-3' |
